# Supplementary material for: miR-449a-5p suppresses CDK6 expression to inhibit cardiomyocyte proliferation
Source: PubMed Central journal article supplement — Mol Med Rep. 2020 Nov 3;23(1):14. doi: 10.3892/mmr.2020.11652 (PMC7673318; doi:10.3892/mmr.2020.11652), 2020-11-03

Figure S1. miR-449a-5p inhibits CM dedifferentiation and induces CM apoptosis *in vitro*. Isolated postnatal day 1 CMs were transfected with mimic-NCs or mimic-miR-449a-5p. (A) mRNA expression levels of CM dedifferentiated markers (RUNX1, mast/stem cell growth factor receptor kit and DAB2) were detected via reverse transcription-quantitative PCR (n=3). (B) Cell apoptosis was detected using TUNEL staining and quantitative analysis of TUNEL-positive CMs are presented (n=3). TUNEL-positive CMs were indicated by arrows. Scale bar, 50  $\mu$ m. Statistical significance was calculated using two-tailed unpaired Student's t-test in (A and B). Error bars represent mean  $\pm$  SEM. \*P<0.05 vs. indicated groups. miR, microRNA; CM, cardiomyocyte; NCs, negative controls; RUNX1, Runt-related transcription factor 1; DAB2, disabled homolog 2; cTnT, cardiac troponin T.

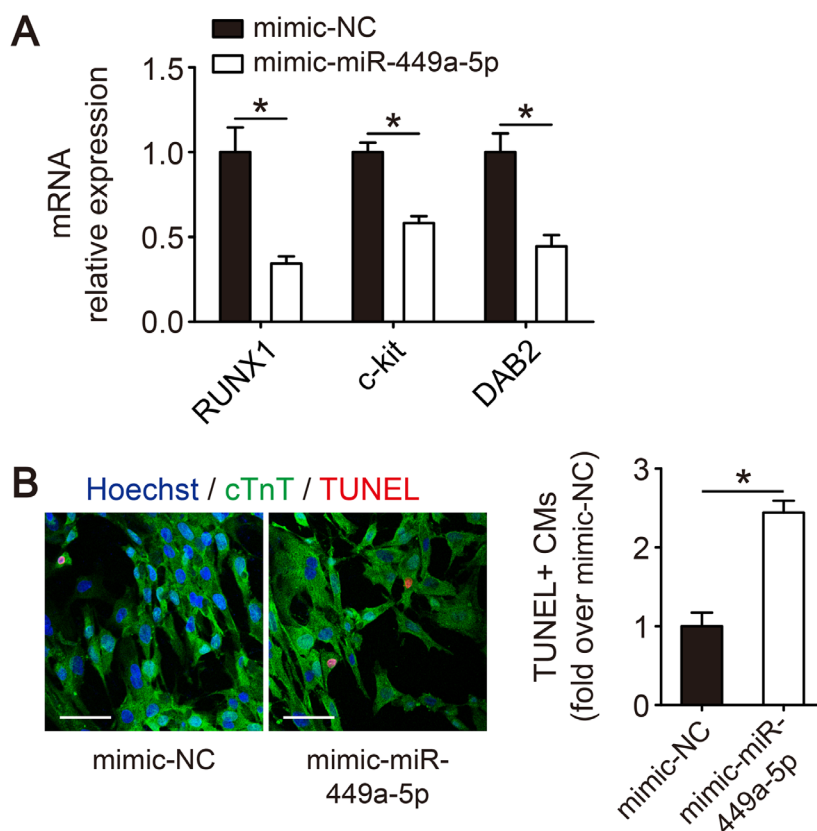

Figure S2. Amplification of cDNA synthesized from different amounts of RNA. The efficiency of amplification of CDK6 and  $\beta$ -actin was examined using reverse transcription-quantitative PCR, and  $\Delta Cq$  ( $Cq_{CDK6} - Cq_{\beta\text{-actin}}$ ) was calculated for each cDNA dilution (n=3).

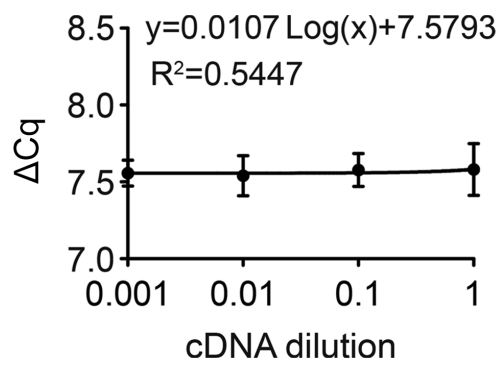

Supplement: Supplementary_Data.pdf [file Supplementary_Data.pdf]
